# Supplementary material
Source: PubMed Central journal article supplement (PMC3010398)
Supplement: NIHMS212935-supplement-2.pdf [file NIHMS212935-supplement-2.pdf]

## List of Supplementary Material

### Materials and Methods

**Fig. S1.** Relationship between plasma lactate concentrations measured by liquid chromatography-mass spectrometry and the MGH clinical chemistry laboratory.

**Fig. 2.** Dendrogram illustrating hierarchical clustering of metabolites that changed with exercise.

**Table S1.** Metabolites that change within plasma in response to exercise in the entire exercise tolerance test cohort (N=70, P<0.05).

**Table S2.** Clinical characteristics of subjects with exercise-induced myocardial ischemia and control subjects without inducible ischemia.

**Table S3.** Differential changes in metabolite concentrations per MET achieved during exercise tolerance testing, among more and less fit individuals.

**Table S4.** Clinical characteristics of Framingham Heart Study participants in whom metabolites were measured.

**Table S5.** Relationship between plasma metabolite concentrations and resting heart rate in Framingham Heart Study participants.

### References
